# Supplementary material for: The relative efficiency of homology-directed repair has distinct effects on proper anaphase chromosome separation
Source: PubMed Central journal article supplement — Nucleic Acids Res. 2011 Mar 31;39(14):5935–44. doi: 10.1093/nar/gkr187 (PMC3152340; doi:10.1093/nar/gkr187), 2011-03-31
Supplement: supp_gkr187_Laulier_Stark_2011_SupData.pdf [file supp_gkr187_Laulier_Stark_2011_SupData.pdf]

## SUPPLEMENTAL FIGURE LEGENDS

**Supplemental Figure 1.** (A) HDR deficiency does not substantially affect the frequency of PICH linkages in early anaphase. Shown is the percentage of early anaphases with PICH linkages in a set of HDR or NHEJ-deficient cell lines, and a cell line enabling DOX-mediated depletion of Blm. (B) *Blm<sup>tet/tet</sup>* cells show a reduced level of Blm after DOX treatment. Shown are Blm and GAPDH immunoblot signals from *Blm<sup>tet/tet</sup>* cells either from the untreated condition or after 48 hours of DOX treatment (1  $\mu$ g/ml). (C) Severe HDR-deficiency causes multipolar anaphases. Shown is the frequency of multipolar anaphases after *L*-treatment in g4Rad51KA cells.

**Video 1.** Normal chromosome segregation in untreated g4Rad51KA cells. Chromatin was labeled by H2B-GFP. Each frame represents a 3 minute time-lapse.

**Video 2.** Binucleated cells leading to multipolar chromosome segregation after 2 days of *L*-treatment in g4Rad51KA cells. Chromatin was labeled by H2B-GFP. Each frame represents a 3 minute time-lapse.

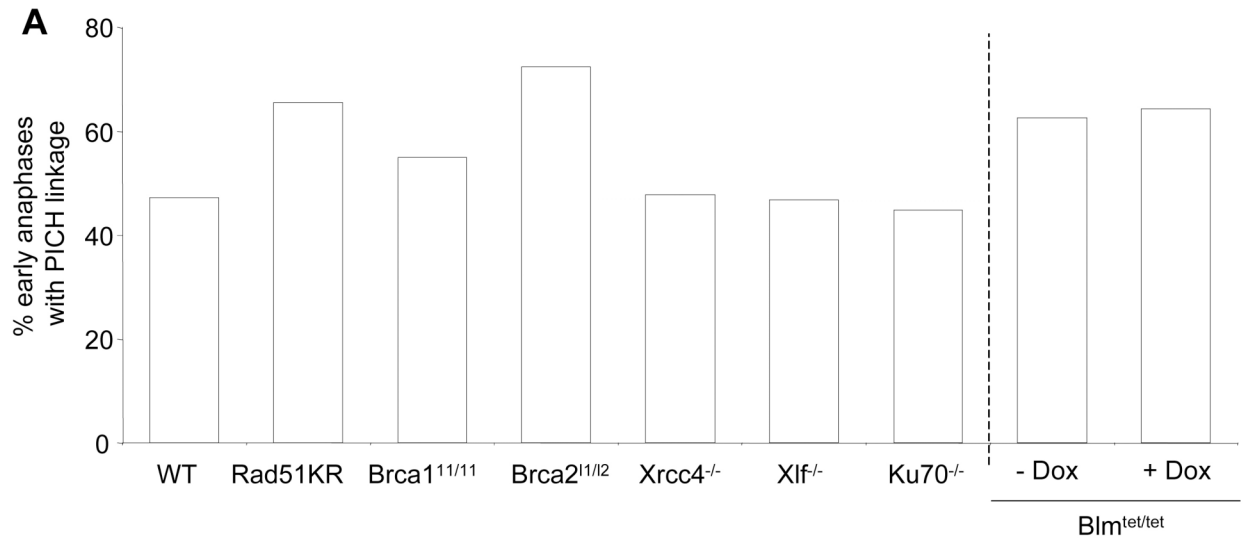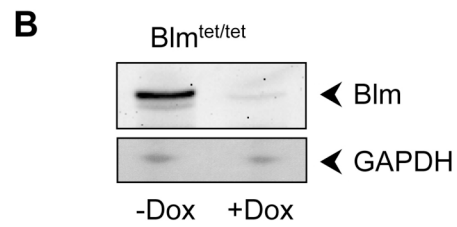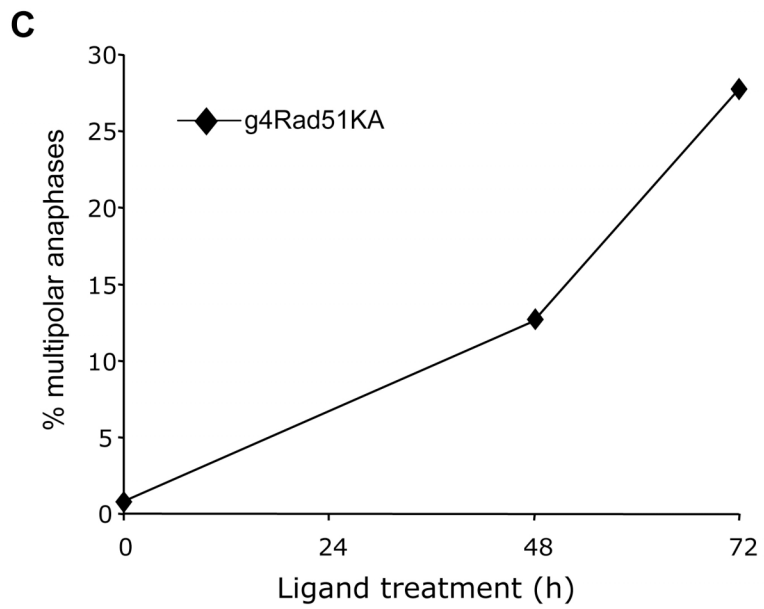

Laulier et al.\_Supplemental Figure 1
